# Supplementary material for: Effects of acute Δ9 -tetrahydrocannabinol on behavior and the endocannabinoid system in HIV-1 Tat transgenic female and male mice
Source: Research Square preprint supplement (doi:10.21203/rs.3.rs-2401488/v1), 2022-12-29
Supplement: Supplementary file 1 [file fae5d45d05ee9d595a7b4986.docx]

**Effects of acute Δ9-tetrahydrocannabinol on behavior and the endocannabinoid system in HIV-1 Tat transgenic female and male mice**

Barkha J. Yadav-Samudrala1, Ben L. Gorman1, Hailey Dodson1, Shreya Ramineni1, Diane Wallace2, Michelle R. Peace3, Justin L. Poklis4, Wei Jiang5,6, and Sylvia Fitting1,*

1Department of Psychology & Neuroscience, University of North Carolina at Chapel Hill, Chapel Hill, NC, 27599, USA; 2Department of Chemistry, University of North Carolina at Chapel Hill, Chapel Hill, NC, 27599, USA; 3Department of Pharmacology & Toxicology, Virginia Commonwealth University, Richmond, VA, 23298, USA; 4Department of Forensic Science, Virginia Commonwealth University, Richmond, VA, 23284, USA; 5Department of Microbiology and Immunology, Medical University of South Carolina, Charleston, SC, 29425, USA; 6Division of Infectious Diseases, Department of Medicine, Medical University of South Carolina, Charleston, SC, 29425, USA

***Corresponding Author:**

Sylvia Fitting, Ph.D.

Department of Psychology and Neuroscience

University of North Carolina

Chapel Hill, NC 27599

Phone: 919-962-6595

Fax: 919-962-2537

E-mail: [sfitting@email.unc.edu](mailto:sfitting@email.unc.edu)

**Materials and Methods**

**Analysis of endocannabinoids and related lipids**

2-AG, AEA, OEA, PEA, and AA were quantified via ultraperformance liquid chromatography-tandem mass spectrometry (UPLC-MS/MS) in four CNS regions of male and female Tat transgenic mice, including the prefrontal cortex, striatum, cerebellum, and spinal cord (all samples were derived from the right hemisphere).  Mice were sacrificed 1 h after drug injection (vehicle or 10 mg/kg THC) via rapid decapitation following isoflurane-induced anesthesia. The four CNS regions were dissected, collected, and snap-frozen in liquid nitrogen within 10 min after decapitation. Samples were stored at −80 °C until the day of analysis. Samples from the right hemisphere were processed and substrates quantified in a similar manner to previous studies (Dempsey et al., 2019; League et al., 2021). Briefly, seven-point calibration curves were prepared at the following concentrations: 0.028 pmol to 2.8 pmol for AEA, 26 pmol to 2600 pmol for 2-AG, 3.1 pmol to 310 pmol for OEA, 3.3 to 330 pmol for PEA, and 0.33 nmol to 33 nmol for AA along with negative and blank controls. The internal standard (ISTD) was added to each calibrator, control, and sample except the blank control at concentrations of 0.28 pmol AEA-d8, 26 pmol 2-AG-d8, 31 OEA-d8, 33 PEA-d8, and 0.33 nmol AA-d8. The calibrator, control and samples were analyzed as previously described (Dempsey et al., 2019). In brief, samples were homogenized in 100 μL ethanol and then 900 μL water was added. Sample cleanup was performed using UCT Clean Up® C18 solid phase extraction column (United Chemical Technologies, Inc., Bristol, PA) conditioned with methanol followed by water. Samples were added and the columns were then washed with deionized water and hexane. Lipids were eluted with eluted 78:20:2 dichloromethane:isopropanol:ammonium hydroxide followed by ethyl acetate. The samples were then evaporated under nitrogen and reconstituted in mobile phase. A Sciex ExionLC system attached to a Sciex 6500 QTRAP system with an IonDrive Turbo V source for TurbolonSpray® (Sciex, Ontario, Canada) controlled by Analyst software (Sciex, Ontario, Canada) was used for the analysis of AEA, 2-AG, OEA, PEA, and AA.

Chromatographic separation of AEA, 2-AG, OEA, PEA, and AA was performed on a Discovery® HS C18 Column 15 cm × 2.1 mm, 3 μm (Supelco: Bellefonte, PA) kept at 25 °C. The mobile phase consisted of A: acetonitrile and B: water with 1 g/L ammonium acetate and 0.1 % formic acid. The following gradient was used: 0.0–2.4 min at 40 % A, 2.5–6.0 min at 40 % A, hold for 2.1 min at 40 % A, then 8.1–9 min 100 % A, hold at 100 % A for 3.1 min and return to 40 % A at 12.1 min with a flow rate of 1.0 mL/min. The source temperature was 600 °C with ionspray voltage of 5,000 V. The curtain gas and source gases 1 and 2 had flow rates of 30, 60, and 50 mL/min, respectively. The mass spectrometer was operated in multiple reaction monitoring (MRM) positive ionization mode for AEA, 2-AG, OEA, PEA, and negative ionization mode for AA. The following transition ions (m/z) with the corresponding collection energies (eV) in parentheses were measured as follows: AEA: 348>62 (13) & 348>91 (60); AEA-d8: 356>63 (13); 2-AG: 379>287 (26) & 379>296 (28); 2-AG-d8: 384>287 (26); OEA: 326>62 (40) & 326 > 283 (40); OEA-d4 330 > 66 (40); PEA: 300 > 62 (31) & 300 > 283 (31); PEA-d4: 304 > 62 (31); AA: 303>259 (-25) & 303>59 (-60); AA-d8: 311>267 (-25). The total run time for the analytical method was 14 min. Calibration curves were analyzed with each analytical batch for each analyte. A linear regression of the ratio of the peak area counts of analyte and corresponding deuterated ISTD vs. concentration was used to construct calibration curves.

**Plasma Sample Preparation**

Following isoflurane-induced anesthesia, 300 µL of blood was drawn from mice via cardiac puncture. Mice were sacrificed immediately after blood collection and the cortex was dissected for UPLC-MS/MS analysis. Blood was collected in 1.5 mL tubes kept on ice that contained 100 µL of EDTA dissolved in PBS (1x). EDTA dissolved in PBS (1x) was collected from EDTA-coated tubes (#366643, BD, Franklin Lakes, NJ, USA) that were rinsed with 500 µL cold PBS (1x). For plasma isolation, blood samples in 1.5 mL tubes were centrifuged at 1350 rfc at 4 °C for 20 min. The super layer of plasma was aspirated (100 µL) and stored at −80 °C until the day of analysis.

**Results**

**Levels of PEA and OEA in the CNS**

To assess the impact of acute THC (0 and 10 mg/kg) exposure on the endogenous cannabinoid system, changes in levels of PEA and OEA were assessed in various CNS regions of Tat transgenic female and male mice (n = 4–5 per group), including the prefrontal cortex, striatum, cerebellum, and spinal cord (**Supplemental Table S2**).  A multivariate three-way ANOVA was conducted for each lipid molecule with drug, sex, and genotype as between-subjects factors. No effects or interactions were noted for acute THC administration on any measure and thus not shown. *F*-values and *p*-values for sex, genotype, and sex x genotype interaction are presented in **Supplemental Table S2**.

For PEA, a significant sex effect was noted for the striatum and spinal cord with females demonstrating lower PEA levels compared to male mice. Further, a significant sex x genotype interaction was noted, with Tat(+) females showing higher PEA levels compared to Tat(−) females, *F*(1, 18) = 4.8, *p* = 0.042, but no difference was noted for males. Specifically, for females this effect was noted for vehicle-exposed females, *F*(1, 8) = 5.9, *p* = 0.041, but not for THC-exposed females.

For OEA, a significant sex effect was noted for the prefrontal cortex, striatum and spinal cord. Interestingly, for the prefrontal cortex females demonstrated higher OEA levels compared to males, whereas for the striatum and spinal cord, females demonstrated lower OEA levels compared to males, similar to what was noted for PEA.

**Relationships between AEA and AA across CNS regions**

As the most prominent findings were noted for AEA and AA levels, we assessed the relationship between levels of AEA and AA across the four CNS regions. Pearson correlations were conducted between both lipid molecules separately for females and males across each CNS region (**Table 1**).

For females, a significant positive correlation was noted for AEA levels in the striatum and AA levels in the prefrontal cortex (*r* = 0.533, *p* = 0.016, *n* = 20) that revealed no significance when separating it for each genotype. Interestingly, a number of significant correlations were noted for females specific to each genotype, which revealed no significance when genotype was combined. For Tat(+) female mice a significant negative correlation was noted for AEA levels in the spinal cord and AA levels in the prefrontal cortex (*r* = -0.662, *p* = 0.037, *n* = 10), as well as AEA levels in the spinal cord and AEA levels in the striatum (*r* = -0.636, *p* = 0.048, *n* = 10). For Tat(-) female mice a significant positive correlation was noted for AEA levels in the striatum and AA levels in the spinal cord (*r* = 0.646, *p* = 0.044, *n* = 10).

For males, a significant positive correlation was noted for AA levels in the striatum and AA levels in the cerebellum (*r* = 0.604, *p* = 0.008, *n* = 18), which was carried by a significant correlation from Tat(+) males (*r* = 0.788, *p* = 0.012, *n* = 9) but not Tat(-) males. Similar to females, a number of significant correlations were noted for males specific to each genotype, which revealed no significance when genotype was combined. Tat(-) males demonstrated a significant positive correlation for AEA levels in the spinal cord and AEA levels in the striatum (*r* = 0.905, *p* < 0.001, *n* = 9), as well as AEA levels in the spinal cord and AEA levels in the cerebellum (*r* = 0.671, *p* = 0.048, *n* = 9).

**Table S1. Multiple reaction monitoring transitions for standards. Quantifying transitions were used for quantitation, qualifying transitions were used to ensure proper identity.**

| **Standard** | **Q1 *m/z*** | **Q3 *m/z*** | **Collision Energy (V)** | **Role** |
| --- | --- | --- | --- | --- |
| THC | 315.2 | 193.1 | 22 | Quantifying |
| THC | 315.2 | 259.1 | 19 | Qualifying |
| THC-COOH | 345.2 | 327.2 | 15 | Quantifying |
| THC-COOH | 345.2 | 229.1 | 25 | Qualifying |
| THC-OH | 331.2 | 313.2 | 14 | Quantifying |
| THC-OH | 331.2 | 193.1 | 27 | Qualifying |

**Table S2. Effects of sex and genotype on PEA and OEA levels (nmol/g) in four CNS regions. Acute THC administration (0 and 10 mg/kg) did not display any effects or interactions for any of the four CNS regions a.**

| **Lipids** | **CNS Region** | **Sex** | **Geno-type** | **Vehicle** | **THC** | **Sex Effect** | | **Genotype Effect** | | **Sex x Genotype** | |
| --- | --- | --- | --- | --- | --- | --- | --- | --- | --- | --- | --- |
| **nmol/g** |  |  |  | **mean ± SEM** | **mean ± SEM** | ***F1, 30*** | ***p*** | ***F1, 30*** | ***p*** | ***F1, 30*** | ***p*** |
| **PEA** | **Prefrontal cortex** | Female | Tat(−) | 2.01 ± 0.06 | 2.38 ± 0.13 | 1.97 | 0.171 | 0.48 | 0.495 | **4.54** | **0.041** |
|  | Tat(+) | 2.91 ± 0.36 | 2.55 ± 0.28 |
| Male | Tat(−) | 2.33 ± 0.26 | 2.34 ± 0.41 |
|  | Tat(+) | 2.12 ± 0.29 | 2.01 ± 0.09 |
| **Striatum** | Female | Tat(−) | 2.41 ± 0.11 | 2.31 ± 0.13 | **11.56** | **0.002** | 0.26 | 0.615 | 0.00 | 0.973 |
|  | Tat(+) | 2.44 ± 0.16 | 2.48 ± 0.10 |
| Male | Tat(−) | 3.15 ± 0.38 | 3.00 ± 0.28 |
|  | Tat(+) | 3.38 ± 0.75 | 3.01 ± 0.26 |
| **Cerebellum** | Female | Tat(−) | 2.16 ±0.32 | 1.94 ± 0.09 | 0.00 | 0.960 | 0.82 | 0.371 | 0.02 | 0.877 |
|  | Tat(+) | 2.14 ± 0.20 | 1.78 ± 0.07 |
| Male | Tat(−) | 2.02 ± 0.10 | 2.14 ± 0.12 |
|  | Tat(+) | 2.09 ± 0.17 | 1.80 ± 0.15 |
| **Spinal cord** | Female | Tat(−) | 1.95 ± 0.12 | 1.90 ± 0.21 | **25.20** | **< 0.001** | 0.46 | 0.504 | 3.86 | 0.059 |
|  | Tat(+) | 1.76 ± 0.12 | 1.63 ± 0.07 |
| Male | Tat(−) | 2.41 ± 0.56 | 2.56 ± 0.32 |
|  | Tat(+) | 3.17 ± 0.40 | 2.76 ± 0.07 |
| **OEA** | **Prefrontal cortex** | Female | Tat(−) | 1.06 ± 0.04 | 1.15 ± 0.78 | **4.71** | **0.038** | 0.05 | 0.833 | 1.72 | 0.199 |
|  | Tat(+) | 1.41 ± 0.22 | 1.11 ± 0.07 |
| Male | Tat(−) | 1.07 ± 0.21 | 0.97 ± 0.17 |
|  | Tat(+) | 0.95 ± 0.15 | 0.88 ± 0.73 |
| **Striatum** | Female | Tat(−) | 1.41 ± 0.05 | 1.36 ± 0.11 | **18.05** | **< 0.001** | 0.51 | 0.479 | 2.88 | 0.100 |
|  | Tat(+) | 1.59 ± 0.09 | 1.62 ± 0.07 |
| Male | Tat(−) | 1.86 ± 0.14 | 1.99 ± 0.21 |
|  | Tat(+) | 1.76 ± 0.14 | 1.92 ± 0.15 |
| **Cerebellum** | Female | Tat(−) | 1.20 ± 0.18 | 1.17 ± 0.08 | 0.38 | 0.543 | 0.05 | 0.818 | 0.21 | 0.650 |
|  | Tat(+) | 1.38 ± 0.18 | 1.14 ± 0.07 |
| Male | Tat(−) | 1.26 ± 0.16 | 1.09 ± 0.16 |
|  | Tat(+) | 1.16 ± 0.13 | 1.14 ± 0.13 |
| **Spinal cord** | Female | Tat(−) | 1.00 ± 0.07 | 1.04 ± 0.78 | **17.14** | **< 0.001** | 0.57 | 0.457 | 0.43 | 0.519 |
|  | Tat(+) | 1.07 ± 0.08 | 0.95 ± 0.03 |
| Male | Tat(−) | 1.60 ± 0.39 | 1.48 ± 0.20 |
|  | Tat(+) | 1.43 ± 0.14 | 1.35 ± 0.03 |

a Levels of PEA and OEA in the prefrontal cortex, striatum, cerebellum, and spinal cord of Tat(−) and Tat(+) female and male mice exposed to acute 10 mg/kg THC or vehicle expressed as mean ± SEM in nmol/g. A multivariate three-way ANOVAs for each lipid molecule was conducted with acute THC, sex, and genotype as between-subjects factors. No effects or interactions were noted for acute THC administration on any measure and are thus not shown in this table. *F*-values and *p*-values are presented from ANOVA results. Bolded values denote significant differences at *p* = 0.05; mean ± SEM, *n* = 4-5 mice per group.

**Table S3. Pearson correlation matrix between object recognition memory (discrimination index) and expression levels of CB1R, CB2R, MAGL, or FAAH in the prefrontal cortex separate for females and males. As 10 mg/kg THC administration had no effects on CB1R, CB2R, MAGL, and FAAH, drug groups were combined.a**

| **CNS region** | **Sex** | **Geno-type** | **Pearson Correlations with Discrimination Index** | | |
| --- | --- | --- | --- | --- | --- |
|  |  |  | ***r*** | ***p*** | ***n*** |
| CB1R | Female | Tat(−) | -0.058 | 0.872 | 10 |
| Tat(+) | -0.531 | 0.115 | 10 |
| (−) & (+) | 0.002 | 0.993 | 20 |
| Male | Tat(−) | 0.468 | 0.204 | 9 |
| Tat(+) | -0.483 | 0.188 | 9 |
| (−) & (+) | 0.118 | 0.641 | 18 |
| CB2R | Female | Tat(−) | -0.137 | 0.706 | 10 |
| Tat(+) | -0.154 | 0.672 | 10 |
| (−) & (+) | -0.103 | 0.665 | 20 |
| Male | Tat(−) | 0.302 | 0.429 | 9 |
| Tat(+) | -0.566 | 0.112 | 9 |
| (−) & (+) | -0.031 | 0.903 | 18 |
| MAGL | Female | Tat(−) | 0.094 | 0.797 | 10 |
| Tat(+) | -0.115 | 0.753 | 10 |
| (−) & (+) | -0.26 | 0.914 | 20 |
| Male | Tat(−) | 0.582 | 0.100 | 9 |
| Tat(+) | -0.188 | 0.629 | 9 |
| (−) & (+) | 0.379 | 0.121 | 18 |
| FAAH | Female | Tat(−) | 0.525 | 0.482 | 10 |
| Tat(+) | -0.317 | 0.372 | 10 |
| (−) & (+) | 0.053 | 0.824 | 20 |
| Male | Tat(−) | 0.348 | 0.359 | 9 |
| Tat(+) | 0.036 | 0.928 | 9 |
| (−) & (+) | -0.011 | 0.966 | 18 |

a No effects or interactions were noted for acute THC administration on any endocannabinoid measure and are thus not shown in this table. No significance is noted for any measure (*p* ≤ 0.05). CNS, central nervous system; *n*, sample size.

**References**

Dempsey SK, Gesseck AM, Ahmad A, Daneva Z, Ritter JK, Poklis JL (2019) Formation of HETE-EAs and dihydroxy derivatives in mouse kidney tissue and analysis by high-performance liquid chromatography tandem mass spectrometry. Journal of Chromatography B, Analytical tTechnologies in the Biomedical and Life Sciences 1126-1127:121748. DOI: 10.1016/j.jchromb.2019.121748

League AF, Gorman BL, Hermes DJ, Johnson CT, Jacobs IR, Yadav-Samudrala BJ, Poklis JL, Niphakis MJ, Cravatt BF, Lichtman AH, Ignatowska-Jankowska BM, Fitting S (2021) Monoacylglycerol Lipase Inhibitor MJN110 Reduces Neuronal Hyperexcitability, Restores Dendritic Arborization Complexity, and Regulates Reward-Related Behavior in Presence of HIV-1 Tat. Frontiers in Neurology 12:651272. DOI: 10.3389/fneur.2021.651272
